# Supplementary material for: Molecular Characterization of Novel Cucurbit Aphid Borne Yellows Virus Strains Infecting Squash and Watermelon in India
Source: Research Square preprint supplement (doi:10.21203/rs.3.rs-1202229/v1), 2022-01-11
Supplement: Supplementary file 1 [file a34fb9b3ba703de008c1edfa.xlsx]

## Sheet: Sheet2
Supplementary Table 1. Identity matrix displaying percent identities based on nucleotide sequencesof Indian CABYV isolates (POL-SQ and POL-WM) with other cucurbits infecting poleroviruses
		COMPLETE		5' UTR		P0		P1		P1-P2		IR		P3		P3-P5		P4		3’ UTR
		Squa	WMN	Squa	WMN	Squa	WMN	Squa	WMN	Squa	WMN	Squa	WMN	Squa	WMN	Squa	WMN	Squa	WMN	Squa	WMN
JQ700308	SABYV	60.4	60.1	90	90	58.6	59.9	57.4	58.1	61.9	62.3	64.4	65.4	82.5	83.1	72.9	73.8	82.1	82.7	62	62
KU315177	PABYV	62.4	62.4	55	55	59	58.2	57.8	56.8	61.1	60.7	67	67.5	85.5	85.3	73.4	72.5	86.1	85.9	50.4	50.4
KU315178	PABYV	62.2	61.6	50	50	57	56.7	57.5	56.5	60.8	60	67.5	67.5	85.5	85.3	73.3	72.3	86.1	85.9	63.7	63.7
JQ700305	CABYV	79.9	79.5	90	90	80.6	81.4	73.1	73.3	75.5	75.7	92.9	93.9	95.1	95.1	86.9	85.2	95.1	95.1	88.8	88.8
LC472499	CABYV	79.3	79.4	90	90	80.7	81	73.7	74.1	75.9	76.2	92.9	93.9	94	93.5	87.1	86	93.9	93.4	51.9	51.9
JF939814	CABYV	79.4	79.6	100	100	79.7	81.8	72.6	72.6	75.3	75.2	92.9	93.4	95.6	95.3	88.2	87.3	95.8	95.4	61.3	63.2
X76931	CABYV	79.5	79.5	100	100	79.8	81.5	72.4	72.5	75.1	75.1	92.4	92.9	95.5	95.1	87.4	86.6	95.4	95.1	63.2	63.2
MG780352	CABYV	78.3	78	100	100	77.5	78.4	71.7	72.2	74.2	74.4	92.4	92.9	95.1	94.6	85.9	85	95.3	94.7	61.3	61.3
EU000535	CABYV	80	79.6	100	100	78.7	79.4	72.2	72.6	74.6	74.6	92.9	92.4	95	95.5	87.3	86.8	94.9	95.4	92.3	92.3
MK055337	CABYV	79.6	79.1	100	100	79	79.5	72.5	72.4	74.4	74.3	93.4	93.9	93.5	94	86.9	86.3	93.7	94.2	92.3	92.3
EU636992	CABYV	80.6	80.1	100	100	79.5	79.2	73.6	73	75.9	75.4	92.9	93.4	95	95.1	87.9	87.2	94.9	95.1	92.3	92.3
LC082306	CABYV	80.6	80	100	100	79.4	79.2	72.9	72.5	75.3	74.9	93.4	93.9	94.5	95	87.8	87.1	94.4	94.9	93.1	93.1
GQ221223	CABYV	80.3	79.6	100	100	78.8	79.2	72.7	71.9	75.2	74.5	91.9	92.4	94.5	94.6	87.6	87	94.4	94.6	91.4	91.4
KR231949	CABYV	80.5	80.2	100	100	79.9	79.4	72.9	73.1	75.3	75.4	93.4	93.9	94.5	95	87.8	87.4	94.6	95.1	92.3	92.3
GQ221224	CABYV	80.4	79.7	100	100	80.6	80.1	73.5	72.8	75.8	75.2	93.4	93.9	94.3	94.8	86.7	85.8	94.4	94.9	93.1	93.1
KR231955	CABYV	80	79.4	100	100	79.9	79.3	73.4	72.4	75.6	75	93.4	93.9	94.1	94.6	86.6	86	94.2	94.7	88	88
HQ439023	CABYV	87.7	87.5	100	100	80.9	81.3	85.4	85.9	87.5	87.7	92.4	92.9	94.8	95.3	88.2	87.3	94.7	95.3	94	94
JQ700306	CABYV	87.7	87.5	95	95	81.3	82.9	87.1	87.5	88.9	89.1	91.4	91.9	95.3	94.6	86.8	85.7	95.3	94.6	83.7	83.7
MG257903	CABYV	80.5	79.9	100	100	80.5	80	73.4	72.6	75.7	75	92.9	93.4	94.1	94.6	86.6	85.9	94.2	94.7	88.8	88.8
JQ700307	MABYV	80.1	80.2	90	90	80.7	79.8	85.8	86.5	88.4	88.5	70.2	69.7	82.9	82.9	73	72.4	81.6	82.3	89.6	89.6
EU000534	MABYV	79.9	79.9	100	100	79.7	80.6	85.4	86	88.2	88.3	69.2	68.7	82.2	82.9	72.8	72	81.8	82.5	90.5	90.5
MK050790	LABYV	55.8	55.5	75	75	55.8	54.2	57.7	57.8	62.9	62.7	64.9	64.9	61.2	63.1	59.4	59.5	61.7	62.4	59.1	59.1
KR476808	LABYV	55.2	54.9	70	70	55.8	54.7	57.4	56.8	62.1	62	64.6	64.6	61.1	62.9	59.3	59.3	61.3	62	60	60
KF427701	LABYV	55.2	54.9	70	70	53.4	53.8	56.9	57.2	61.8	62.2	64.1	64.1	61.1	62.9	59.3	59.3	61.3	62	60	60
SQUASH	CABYV	100	95.2	100	100	100	94.4	100	94	100	94.8	100	98.4	100	98.8	100	95.8	100	98.7	100	100
WMN	CABYV	95.2	100	100	100	94.4	100	94	100	94.8	100	98.4	100	98.8	100	95.8	100	98.7	100	100	100
